# Supplementary material
Source: PubMed Central journal article supplement (PMC3698868)
Supplement: NIHMS476514-supplement-Supplementary_Tables.pdf [file NIHMS476514-supplement-Supplementary_Tables.pdf]

Supplementary Table 1: Odds of SCCHN Related to Tobacco Use and Alcohol Consumption Within the Carolina Head and Neck Cancer Study (CHANCE), 2002-2006, Stratified by Tumor Site, Total Population

| Risk Factor                     | Controls |      |     |      | Oral Cavity (N=192) |          |            | Oropharynx (N=361) |      |       |          |            | Hypopharynx (N=67) |      |       |          |                          |
|---------------------------------|----------|------|-----|------|---------------------|----------|------------|--------------------|------|-------|----------|------------|--------------------|------|-------|----------|--------------------------|
|                                 | N        | %    | N   | %    | Crude               | Adjusted | 95% CI     | N                  | %    | Crude | Adjusted | 95% CI     | N                  | %    | Crude | Adjusted | 95% CI                   |
|                                 |          |      |     |      | OR                  | OR       |            |                    |      | OR    | OR       |            |                    |      | OR    | OR       |                          |
| <b>Current Cigarette Use</b>    |          |      |     |      |                     |          |            |                    |      |       |          |            |                    |      |       |          |                          |
| Never smoked                    | 525      | 38.1 | 21  | 11.2 | 1                   | 1        |            | 71                 | 19.7 | 1     | 1        |            | 5                  | 7.6  | 1     | 1        |                          |
| Ex-smoker                       | 583      | 42.3 | 45  | 23.7 | 2.35                | 1.96     | 1.05, 3.68 | 127                | 35.2 | 1.77  | 1.35     | 0.92, 1.98 | 14                 | 21.2 | 2.37  | 1.72     | 0.44, 6.74 <sup>b</sup>  |
| Current Smoker                  | 269      | 19.5 | 124 | 65.3 | 14.5                | 7.07     | 3.83, 13.0 | 163                | 45.2 | 3.64  | 1.63     | 1.08, 2.45 | 47                 | 71.2 | 16.7  | 5.87     | 1.59, 21.7 <sup>b</sup>  |
| <b>Cigarettes Per Day</b>       |          |      |     |      |                     |          |            |                    |      |       |          |            |                    |      |       |          |                          |
| None                            | 525      | 38.2 | 21  | 10.9 | 1                   | 1        |            | 71                 | 19.7 | 1     | 1        |            | 5                  | 7.7  | 1     | 1        |                          |
| 1-19                            | 338      | 24.6 | 31  | 16.2 | 2.49                | 2.21     | 1.13, 4.31 | 67                 | 18.6 | 1.43  | 1.14     | 0.74, 1.76 | 15                 | 23.1 | 3.84  | 2.63     | 0.65, 10.6               |
| 20+                             | 512      | 37.2 | 140 | 72.9 | 9.57                | 4.95     | 2.73, 8.96 | 222                | 61.7 | 3.24  | 1.69     | 1.15, 2.47 | 45                 | 69.2 | 9.87  | 4.04     | 1.10, 14.9               |
| <b>Years Smoking Cigarettes</b> |          |      |     |      |                     |          |            |                    |      |       |          |            |                    |      |       |          |                          |
| None                            | 525      | 38.2 | 21  | 11.1 | 1                   | 1        |            | 71                 | 19.8 | 1     | 1        |            | 5                  | 7.94 | 1     | 1        |                          |
| 1-19                            | 294      | 21.4 | 12  | 6.32 | 1.14                | 1.36     | 0.60, 3.05 | 47                 | 13.1 | 0.98  | 0.93     | 0.59, 1.47 | 3                  | 4.76 | 0.96  | 0.42     | 0.042, 4.20 <sup>b</sup> |
| 20+                             | 554      | 40.4 | 157 | 82.6 | 9.06                | 4.9      | 2.74, 8.77 | 240                | 67   | 3.66  | 1.88     | 1.27, 2.77 | 55                 | 87.3 | 10.4  | 5.07     | 1.40, 18.3 <sup>b</sup>  |
| <b>Ever Beer</b>                |          |      |     |      |                     |          |            |                    |      |       |          |            |                    |      |       |          |                          |
| No                              | 499      | 36.2 | 37  | 19.4 | 1                   | 1        |            | 59                 | 16.4 | 1     | 1        |            | 5                  | 7.7  | 1     | 1        |                          |
| Yes                             | 878      | 63.8 | 154 | 80.6 | 3.28                | 2.28     | 1.29, 4.05 | 301                | 83.6 | 2.02  | 1.19     | 0.78, 1.82 | 301                | 83.6 | 6.62  | 4.56     | 1.13, 18.5               |
| <b>Ever Wine</b>                |          |      |     |      |                     |          |            |                    |      |       |          |            |                    |      |       |          |                          |
| No                              | 597      | 43.4 | 96  | 50.5 | 1                   | 1        |            | 143                | 39.7 | 1     | 1        |            | 24                 | 39.7 | 1     | 1        |                          |
| Yes                             | 778      | 56.6 | 94  | 49.5 | 0.77                | 0.65     | 0.44, 0.96 | 217                | 60.3 | 1     | 1.01     | 0.73, 1.38 | 40                 | 62.5 | 1.21  | 1        | 0.48, 2.09               |
| <b>Ever Liquor</b>              |          |      |     |      |                     |          |            |                    |      |       |          |            |                    |      |       |          |                          |
| No                              | 491      | 35.7 | 51  | 26.6 | 1                   | 1        |            | 63                 | 17.5 | 1     | 1        |            | 10                 | 15.4 | 1     | 1        |                          |
| Yes                             | 886      | 64.3 | 141 | 73.4 | 1.77                | 1.05     | 0.65, 1.69 | 298                | 82.6 | 2.05  | 1.65     | 1.12, 2.41 | 55                 | 84.6 | 2.55  | 1.23     | 0.49, 3.08               |

Supplementary Table 1 (con.)

| Risk Factor                     | Controls |      | Oral cavity-Oropharynx-Hypopharynx NOS (N=247) |      |       |      |            |          | Larynx (N=473) |        |      |      |       |            |          |  |
|---------------------------------|----------|------|------------------------------------------------|------|-------|------|------------|----------|----------------|--------|------|------|-------|------------|----------|--|
|                                 | N        | %    | N                                              | %    | Crude |      |            | Adjusted |                |        | N    | %    | Crude |            | Adjusted |  |
|                                 |          |      |                                                |      | OR    | OR   | 95% CI     | OR       | OR             | 95% CI |      |      | OR    | OR         | 95% CI   |  |
| <b>Current Cigarette Use</b>    |          |      |                                                |      |       |      |            |          |                |        |      |      |       |            |          |  |
| Never smoked                    | 525      | 38.1 | 57                                             | 23.1 | 1     | 1    |            |          |                | 19     | 4    | 1    | 1     |            |          |  |
| Ex-smoker                       | 583      | 42.3 | 67                                             | 27.1 | 1.22  | 0.8  | 0.51, 1.27 |          |                | 141    | 35.8 | 6.08 | 5.44  | 3.08, 9.61 |          |  |
| Current Smoker                  | 269      | 19.5 | 123                                            | 49.8 | 4.05  | 1.77 | 1.13, 2.77 |          |                | 313    | 66.2 | 34   | 19.5  | 11.1, 34.5 |          |  |
| <b>Cigarettes Per Day</b>       |          |      |                                                |      |       |      |            |          |                |        |      |      |       |            |          |  |
| None                            | 525      | 38.2 | 57                                             | 23.3 | 1     | 1    |            |          |                | 19     | 4    | 1    | 1     |            |          |  |
| 1-19                            | 338      | 24.6 | 46                                             | 18.8 | 1.25  | 0.87 | 0.53, 1.42 |          |                | 72     | 15.2 | 5.27 | 4.9   | 2.68, 8.95 |          |  |
| 20+                             | 512      | 37.2 | 142                                            | 58   | 3.03  | 1.45 | 0.94, 2.24 |          |                | 382    | 80.8 | 22.5 | 14.2  | 8.19, 24.7 |          |  |
| <b>Years Smoking Cigarettes</b> |          |      |                                                |      |       |      |            |          |                |        |      |      |       |            |          |  |
| None                            | 525      | 38.2 | 57                                             | 23.2 | 1     | 1    |            |          |                | 19     | 4.03 | 1    | 1     |            |          |  |
| 1-19                            | 294      | 21.4 | 31                                             | 12.6 | 0.87  | 0.73 | 0.43, 1.23 |          |                | 26     | 5.51 | 2.18 | 2.57  | 1.31, 5.04 |          |  |
| 20+                             | 554      | 40.4 | 158                                            | 64.2 | 2.88  | 1.55 | 1.00, 2.40 |          |                | 427    | 90.5 | 22.9 | 14.8  | 8.50, 25.9 |          |  |
| <b>Ever Beer</b>                |          |      |                                                |      |       |      |            |          |                |        |      |      |       |            |          |  |
| No                              | 499      | 36.2 | 50                                             | 20.3 | 1     | 1    |            |          |                | 92     | 19.5 | 1    | 1     |            |          |  |
| Yes                             | 878      | 63.8 | 196                                            | 79.7 | 2.44  | 1.62 | 1.00, 2.62 |          |                | 380    | 80.5 | 2.19 | 1.1   | 0.75, 1.61 |          |  |
| <b>Ever Wine</b>                |          |      |                                                |      |       |      |            |          |                |        |      |      |       |            |          |  |
| No                              | 597      | 43.4 | 105                                            | 42.5 | 1     | 1    |            |          |                | 266    | 56.6 | 1    | 1     |            |          |  |
| Yes                             | 778      | 56.6 | 142                                            | 57.5 | 0.97  | 1    | 0.69, 1.43 |          |                | 204    | 43.4 | 0.54 | 0.53  | 0.39, 0.71 |          |  |
| <b>Ever Liquor</b>              |          |      |                                                |      |       |      |            |          |                |        |      |      |       |            |          |  |
| No                              | 491      | 35.7 | 58                                             | 23.5 | 1     | 1    |            |          |                | 94     | 19.9 | 1    | 1     |            |          |  |
| Yes                             | 886      | 64.3 | 189                                            | 76.5 | 1.76  | 1.21 | 0.79, 1.85 |          |                | 378    | 80.1 | 1.96 | 1.56  | 1.10, 2.23 |          |  |

CI: confidence interval; OR: odds ratio

<sup>a</sup>All models exclude missing data; Crude models adjust for matching factors and their interactions; Adjusted models include matching factors, their interactions, education, and fruit and vegetable consumption; Cigarette models adjusted for alcohol consumption and use of other tobacco; Alcohol models adjusted for duration of cigarette smoking, use of other tobacco and other types of alcohol

<sup>b</sup>Estimates obtained from models fit using conditional logistic regression due to convergence issues when using unconditional logistic regression

Supplementary Table 2: Odds of SCCHN Related to Tobacco and Alcohol Consumption among African-Americans Within the Carolina Head and Neck Cancer Study (CHANCE), 2002-2006, Stratified by Tumor Site

| Risk Factor                     | Controls |      | Oral Cavity (N=52; 14.8% of cases) |      |       |          |                  | Oropharynx (N=84; 23.9% of cases) |      |       |          |            | Hypopharynx (N=28; 7.98% of cases) |      |       |          |                         |
|---------------------------------|----------|------|------------------------------------|------|-------|----------|------------------|-----------------------------------|------|-------|----------|------------|------------------------------------|------|-------|----------|-------------------------|
|                                 | N        | %    | N                                  | %    | Crude | Adjusted | 95% CI           | N                                 | %    | Crude | Adjusted | 95% CI     | N                                  | %    | Crude | Adjusted | 95% CI                  |
|                                 |          |      |                                    |      | OR    | OR       |                  |                                   |      | OR    | OR       |            |                                    |      | OR    | OR       |                         |
| <b>Ever Cigarette Use</b>       |          |      |                                    |      |       |          |                  |                                   |      |       |          |            |                                    |      |       |          |                         |
| No                              | 103      | 39   | 2                                  | 3.85 | 1     | 1        | --               | 1                                 | 1.19 | 1     | 1        | --         | 3                                  | 10.7 | 1     | 1        | --                      |
| Yes                             | 161      | 61   | 50                                 | 96.2 | 20.3  | 4.05E+10 | 2.26e10,7.29 e10 | 83                                | 98.8 | 53.5  | 25.8     | 3.42, 194  | 25                                 | 89.3 | 4.56  | 2.9      | 0.33, 25.3              |
| <b>Current Cigarette Use</b>    |          |      |                                    |      |       |          |                  |                                   |      |       |          |            |                                    |      |       |          |                         |
| Never smoked                    | 103      | 39   | 2                                  | 3.92 | 1     | 1        | --               | 1                                 | 1.19 | 1     | 1        | --         | 3                                  | 11.1 | 1     | 1        | --                      |
| Ex-smoker                       | 97       | 36.7 | 8                                  | 15.7 | 5.82  | 1.36E+10 | 4.03e9,4.60e10   | 16                                | 19.1 | 18.6  | 11.5     | 1.43, 92.6 | 6                                  | 22.2 | 1.94  | 2        | 0.19, 20.9 <sup>b</sup> |
| Current Smoker                  | 64       | 24.2 | 41                                 | 80.4 | 39.4  | 7.34E+10 | 3.86e10,1.4e11   | 67                                | 79.8 | 102   | 43       | 5.56, 333  | 18                                 | 66.7 | 7.97  | 3.5      | 0.38, 31.9 <sup>b</sup> |
| <b>Cigarettes Per Day</b>       |          |      |                                    |      |       |          |                  |                                   |      |       |          |            |                                    |      |       |          |                         |
| None                            | 103      | 39   | 2                                  | 3.85 | 1     | 1        | --               | 1                                 | 1.19 | 1     | 1        | --         | 3                                  | 11.1 | 1     | 1        | --                      |
| 1-19                            | 95       | 36   | 14                                 | 26.9 | 9.67  | 2.36E+10 | 7.79e9, 7.15e10  | 28                                | 33.3 | 31.5  | 18.6     | 2.38, 145  | 11                                 | 40.7 | 3.56  | 3.57     | 0.37, 34.6              |
| 20+                             | 66       | 25   | 36                                 | 69.2 | 36.1  | 6.64E+10 | 3.58e10, 1.23e11 | 55                                | 65.5 | 84.7  | 35.3     | 4.56, 272  | 13                                 | 48.2 | 5.65  | 2.55     | 0.27, 23.8              |
| <b>Years Smoking Cigarettes</b> |          |      |                                    |      |       |          |                  |                                   |      |       |          |            |                                    |      |       |          |                         |
| None                            | 103      | 39   | 2                                  | 4    | 1     | 1        | --               | 1                                 | 1.22 | 1     | 1        | --         | 3                                  | 12   | 1     | 1        | --                      |
| 1-19                            | 55       | 20.8 | 0                                  | 0    |       |          |                  | 3                                 | 3.66 | 5.27  | 5.48     | 0.53, 56.5 | 1                                  | 4    | 0.57  | 1.60E-06 | 0,infinity <sup>b</sup> |
| 20+                             | 106      | 40.2 | 48                                 | 96   | 44.4  | 6.35E+10 | 3.48e10, 1.16e11 | 78                                | 95.1 | 83.6  | 35.5     | 4.66, 271  | 21                                 | 84   | 5.92  | 3.63     | 0.42, 31.6 <sup>b</sup> |
| <b>Pack-years</b>               |          |      |                                    |      |       |          |                  |                                   |      |       |          |            |                                    |      |       |          |                         |
| None                            | 103      | 39   | 2                                  | 4    | 1     | 1        | --               | 1                                 | 1.22 | 1     | 1        | --         | 3                                  | 12   | 1     | 1        | --                      |
| Less than 20                    | 94       | 35.6 | 8                                  | 16   | 5.24  | 1.51E+10 | 4.31e9,5.27e10   | 17                                | 20.7 | 18.2  | 10.6     | 1.31, 85.4 | 7                                  | 28   | 2.34  | 3.07     | 0.32, 29.7 <sup>b</sup> |
| 20+                             | 67       | 25.4 | 40                                 | 80   | 51.5  | 9.98E+10 | 5.37e10, 1.85e11 | 64                                | 78.1 | 130   | 53.8     | 6.88, 421  | 15                                 | 60   | 6.84  | 2.67     | 0.29, 24.5 <sup>b</sup> |
| <b>Ever Beer</b>                |          |      |                                    |      |       |          |                  |                                   |      |       |          |            |                                    |      |       |          |                         |
| No                              | 38       | 10.9 | 5                                  | 9.62 | 1     | 1        | --               | 6                                 | 7.14 | 1     | 1        | --         | 3                                  | 11.5 | 1     | 1        | --                      |
| Yes                             | 310      | 89.1 | 47                                 | 90.4 | 5.06  | 3.8      | 0.97, 14.9       | 78                                | 92.9 | 5.08  | 2.06     | 0.79, 5.37 | 23                                 | 88.5 | 2.77  | 3.87     | 0.31, 48.3              |
| <b>Ever Wine</b>                |          |      |                                    |      |       |          |                  |                                   |      |       |          |            |                                    |      |       |          |                         |
| No                              | 110      | 31.6 | 20                                 | 39.2 | 1     | 1        | --               | 19                                | 22.6 | 1     | 1        | --         | 5                                  | 18.5 | 1     | 1        | --                      |
| Yes                             | 238      | 68.4 | 31                                 | 60.8 | 1.49  | 0.88     | 0.41, 1.90       | 65                                | 77.4 | 2.8   | 1.83     | 0.95, 3.51 | 22                                 | 81.5 | 4.19  | 2.63     | 0.60, 11.6              |
| <b>Ever Liquor</b>              |          |      |                                    |      |       |          |                  |                                   |      |       |          |            |                                    |      |       |          |                         |
| No                              | 40       | 11.4 | 9                                  | 17.3 | 1     | 1        | --               | 7                                 | 8.33 | 1     | 1        | --         | 3                                  | 11.1 | 1     | 1        | --                      |
| Yes                             | 310      | 88.6 | 43                                 | 82.7 | 2.96  | 1.89     | 0.67, 5.32       | 77                                | 91.7 | 5.12  | 2.9      | 1.14, 7.36 | 24                                 | 88.9 | 2.99  | 1.02     | 0.15, 6.72              |

Supplementary Table 2 (con.)

| Controls                 |     |      | Oral cavity-Oropharynx-Hypopharynx NOS<br>(N=59 16.8% of cases) |      |             |                |            | Larynx (N=128; 36.5% of cases) |      |             |                |            |
|--------------------------|-----|------|-----------------------------------------------------------------|------|-------------|----------------|------------|--------------------------------|------|-------------|----------------|------------|
| Risk Factor              | N   | %    | N                                                               | %    | Crude<br>OR | Adjusted<br>OR | 95% CI     | N                              | %    | Crude<br>OR | Adjusted<br>OR | 95% CI     |
| Ever Cigarette Use       |     |      |                                                                 |      |             |                |            |                                |      |             |                |            |
| No                       | 103 | 39   | 7                                                               | 11.9 | 1           | 1              | --         | 3                              | 2.34 | 1           | 1              | --         |
| Yes                      | 161 | 61   | 52                                                              | 88.1 | 5.07        | 2.67           | 1.02, 7.05 | 125                            | 97.7 | 26.3        | 21.3           | 4.94, 92.2 |
| Current Cigarette Use    |     |      |                                                                 |      |             |                |            |                                |      |             |                |            |
| Never smoked             | 103 | 39   | 7                                                               | 11.9 | 1           | 1              | --         | 3                              | 2.34 | 1           | 1              | --         |
| Ex-smoker                | 97  | 36.7 | 12                                                              | 20.3 | 2.12        | 1.55           | 0.51, 4.76 | 38                             | 29.7 | 12.4        | 14             | 3.11, 62.8 |
| Current Smoker           | 64  | 24.2 | 40                                                              | 67.8 | 9.27        | 4              | 1.45, 11.1 | 87                             | 68   | 51.4        | 32             | 7.20, 142  |
| Cigarettes Per Day       |     |      |                                                                 |      |             |                |            |                                |      |             |                |            |
| None                     | 103 | 39   | 7                                                               | 11.9 | 1           | 1              | --         | 3                              | 2.34 | 1           | 1              | --         |
| 1-19                     | 95  | 36   | 16                                                              | 27.1 | 2.66        | 1.75           | 0.60, 5.13 | 38                             | 29.7 | 13.4        | 13.5           | 3.03, 60.5 |
| 20+                      | 66  | 25   | 36                                                              | 61   | 8.9         | 4.09           | 1.45, 11.5 | 87                             | 68   | 46.8        | 35             | 7.85, 156  |
| Years Smoking Cigarettes |     |      |                                                                 |      |             |                |            |                                |      |             |                |            |
| None                     | 103 | 39   | 7                                                               | 11.9 | 1           | 1              | --         | 3                              | 2.36 | 1           | 1              | --         |
| 1-19                     | 55  | 20.8 | 7                                                               | 11.9 | 1.65        | 1.71           | 0.49, 5.97 | 8                              | 6.3  | 4.39        | 6.3            | 1.20, 33.0 |
| 20+                      | 106 | 40.2 | 45                                                              | 76.3 | 7.38        | 3.31           | 1.22, 8.99 | 116                            | 91.3 | 42.2        | 31.6           | 7.20, 139  |
| Pack-years               |     |      |                                                                 |      |             |                |            |                                |      |             |                |            |
| None                     | 103 | 39   | 7                                                               | 11.9 | 1           | 1              | --         | 3                              | 2.36 | 1           | 1              | --         |
| Less than 20             | 94  | 35.6 | 15                                                              | 25.4 | 2.28        | 1.7            | 0.58, 4.94 | 34                             | 26.8 | 12.3        | 12.9           | 2.86, 58.1 |
| 20+                      | 67  | 25.4 | 37                                                              | 62.7 | 11.4        | 5.12           | 1.77, 14.8 | 90                             | 70.9 | 52.7        | 41.8           | 9.29, 188  |
| Ever Beer                |     |      |                                                                 |      |             |                |            |                                |      |             |                |            |
| No                       | 38  | 10.9 | 8                                                               | 13.6 | 1           | 1              | --         | 16                             | 12.6 | 1           | 1              | --         |
| Yes                      | 310 | 89.1 | 51                                                              | 86.4 | 2.79        | 1.83           | 0.69, 4.86 | 111                            | 87.4 | 3.34        | 1.08           | 0.49, 2.36 |
| Ever Wine                |     |      |                                                                 |      |             |                |            |                                |      |             |                |            |
| No                       | 110 | 31.6 | 16                                                              | 27.1 | 1           | 1              | --         | 50                             | 39.4 | 1           | 1              | --         |
| Yes                      | 238 | 68.4 | 43                                                              | 72.9 | 2.3         | 1.79           | 0.85, 3.76 | 77                             | 60.6 | 1.39        | 0.75           | 0.42, 1.34 |
| Ever Liquor              |     |      |                                                                 |      |             |                |            |                                |      |             |                |            |
| No                       | 40  | 11.4 | 6                                                               | 10.2 | 1           | 1              | --         | 15                             | 11.7 | 1           | 1              | --         |
| Yes                      | 310 | 88.6 | 53                                                              | 89.8 | 4.77        | 2.31           | 0.81, 6.61 | 113                            | 88.3 | 3.44        | 2.77           | 1.21, 6.38 |

OR: odds ratio; CI: confidence interval

<sup>a</sup>All models exclude missing data; Crude models adjust for matching factors and their interactions; Adjusted models include matching factors, their interactions, education, and fruit and vegetable consumption; Cigarette models adjusted for alcohol consumption and use of other tobacco; Alcohol models adjusted for duration of cigarette smoking, use of other tobacco and other types of alcohol

<sup>b</sup>Estimates obtained from models fit using conditional logistic regression due to convergence issues when using unconditional logistic regression

Supplementary Table 3: Odds of SCCHN Related to Tobacco Use and Alcohol Consumption among Whites Within the Carolina Head and Neck Cancer Study (CHANCE), 2002-2006, Stratified by Tumor Site

| Risk Factor              | Controls |      | Oral Cavity (N=140; 14.2% of cases) |      |       |      |            | Oropharynx (N=277; 28% of cases) |      |       |      |            | Hypopharynx (N=39; 3.9% of cases) |      |       |      |                         |
|--------------------------|----------|------|-------------------------------------|------|-------|------|------------|----------------------------------|------|-------|------|------------|-----------------------------------|------|-------|------|-------------------------|
|                          | N        | %    | N                                   | %    | Crude |      |            | N                                | %    | Crude |      |            | N                                 | %    | Crude |      |                         |
|                          |          |      |                                     |      | OR    | OR   | 95% CI     |                                  |      | OR    | OR   | 95% CI     |                                   |      | OR    | OR   | 95% CI                  |
| Ever Cigarette Use       |          |      |                                     |      |       |      |            |                                  |      |       |      |            |                                   |      |       |      |                         |
| No                       | 422      | 37.9 | 19                                  | 13.6 | 1     | 1    | --         | 70                               | 25.3 | 1     | 1    | --         | 2                                 | 5.13 | 1     | 1    | --                      |
| Yes                      | 691      | 62.1 | 121                                 | 86.4 | 4.7   | 2.77 | 1.54, 4.98 | 207                              | 74.7 | 1.79  | 1.08 | 0.74, 1.58 | 37                                | 94.9 | 10.6  | 3.74 | 0.81, 17.2              |
| Current Cigarette Use    |          |      |                                     |      |       |      |            |                                  |      |       |      |            |                                   |      |       |      |                         |
| Never smoked             | 422      | 37.9 | 19                                  | 13.7 | 1     | 1    | --         | 70                               | 25.3 | 1     | 1    | --         | 2                                 | 5.13 | 1     | 1    | --                      |
| Ex-smoker                | 486      | 43.7 | 37                                  | 26.6 | 2     | 1.65 | 0.86, 3.16 | 111                              | 40.1 | 1.52  | 1.18 | 0.78, 1.77 | 8                                 | 20.5 | 3.12  | 1.6  | 0.31, 8.44 <sup>b</sup> |
| Current Smoker           | 205      | 18.4 | 83                                  | 59.7 | 11.8  | 5.15 | 2.70, 9.79 | 96                               | 34.7 | 2.23  | 0.99 | 0.63, 1.55 | 29                                | 47.4 | 29.7  | 7.29 | 1.53, 34.6 <sup>b</sup> |
| Cigarettes Per Day       |          |      |                                     |      |       |      |            |                                  |      |       |      |            |                                   |      |       |      |                         |
| None                     | 422      | 37.9 | 19                                  | 13.6 | 1     | 1    | --         | 70                               | 25.4 | 1     | 1    | --         | 2                                 | 5.26 | 1     | 1    | --                      |
| 1-19                     | 243      | 21.9 | 17                                  | 12.1 | 1.73  | 1.68 | 0.80, 3.50 | 39                               | 14.1 | 0.99  | 0.84 | 0.51, 1.38 | 4                                 | 10.5 | 3.51  | 1.56 | 0.23, 10.4              |
| 20+                      | 446      | 40.1 | 104                                 | 74.3 | 7.12  | 3.57 | 1.93, 6.63 | 167                              | 60.5 | 2.27  | 1.23 | 0.82, 1.84 | 32                                | 84.2 | 15.3  | 5.21 | 1.08, 25.2              |
| Years Smoking Cigarettes |          |      |                                     |      |       |      |            |                                  |      |       |      |            |                                   |      |       |      |                         |
| None                     | 422      | 38.1 | 19                                  | 13.6 | 1     | 1    | --         | 70                               | 25.4 | 1     | 1    | --         | 2                                 | 5.26 | 1     | 1    | --                      |
| 1-19                     | 239      | 21.6 | 12                                  | 8.57 | 1.25  | 1.32 | 0.59, 2.99 | 44                               | 15.9 | 0.9   | 0.83 | 0.52, 1.33 | 2                                 | 5.26 | 1.53  | 0.61 | 0.05, 7.01 <sup>b</sup> |
| 20+                      | 448      | 40.4 | 109                                 | 77.9 | 6.84  | 3.61 | 1.98, 6.61 | 162                              | 58.7 | 2.5   | 1.31 | 0.86, 1.98 | 34                                | 89.5 | 16.9  | 5.85 | 1.25, 27.3 <sup>b</sup> |
| Pack-years               |          |      |                                     |      |       |      |            |                                  |      |       |      |            |                                   |      |       |      |                         |
| None                     | 422      | 38.1 | 19                                  | 13.6 | 1     | 1    | --         | 70                               | 25.5 | 1     | 1    | --         | 2                                 | 5.41 | 1     | 1    | --                      |
| 1-19                     | 279      | 25.2 | 13                                  | 9.29 | 1.17  | 1.25 | 0.57, 2.74 | 43                               | 15.6 | 0.83  | 0.74 | 0.46, 1.19 | 3                                 | 8.11 | 2.14  | 0.98 | 0.13, 7.54 <sup>b</sup> |
| 20+                      | 406      | 36.7 | 108                                 | 77.1 | 8.14  | 4.08 | 2.20, 7.58 | 162                              | 58.9 | 2.71  | 1.43 | 0.94, 2.18 | 32                                | 86.5 | 18.5  | 5.81 | 1.22, 27.8 <sup>b</sup> |
| Ever Beer                |          |      |                                     |      |       |      |            |                                  |      |       |      |            |                                   |      |       |      |                         |
| No                       | 411      | 36.9 | 32                                  | 23   | 1     | 1    | --         | 53                               | 19.2 | 1     | 1    | --         | 2                                 | 5.13 | 1     | 1    | --                      |
| Yes                      | 703      | 63.1 | 107                                 | 77   | 2.92  | 2.07 | 1.12, 3.82 | 223                              | 80.8 | 1.64  | 1.07 | 0.68, 1.68 | 37                                | 94.9 | 13.1  | 4.85 | 0.95, 24.6              |
| Ever Wine                |          |      |                                     |      |       |      |            |                                  |      |       |      |            |                                   |      |       |      |                         |
| No                       | 469      | 42.2 | 76                                  | 54.7 | 1     | 1    | --         | 124                              | 44.9 | 1     | 1    | --         | 19                                | 51.4 | 1     | 1    | --                      |
| Yes                      | 642      | 57.8 | 63                                  | 45.3 | 0.63  | 0.58 | 0.37, 0.91 | 152                              | 55.1 | 0.78  | 0.85 | 0.60, 1.21 | 18                                | 48.7 | 0.65  | 0.71 | 0.30, 1.65              |
| Ever Liquor              |          |      |                                     |      |       |      |            |                                  |      |       |      |            |                                   |      |       |      |                         |
| No                       | 404      | 36.3 | 42                                  | 30   | 1     | 1    | --         | 56                               | 20.2 | 1     | 1    | --         | 7                                 | 18.4 | 1     | 1    | --                      |
| Yes                      | 709      | 63.7 | 98                                  | 70   | 1.53  | 1.09 | 0.64, 1.85 | 221                              | 79.8 | 1.71  | 1.47 | 0.96, 2.25 | 31                                | 81.6 | 2.37  | 1.68 | 0.55, 5.11              |

Supplementary Table 3 (con.)

| Risk Factor              | Controls |      | Oral cavity-Oropharynx-Hypopharynx NOS (N=188; 19% of cases) |      |       |          |            | Larynx (N=345; 34.9% of cases) |      |       |          |            |
|--------------------------|----------|------|--------------------------------------------------------------|------|-------|----------|------------|--------------------------------|------|-------|----------|------------|
|                          | N        | %    | N                                                            | %    | Crude | Adjusted |            | N                              | %    | Crude | Adjusted |            |
|                          |          |      |                                                              |      | OR    | OR       | 95% CI     |                                |      | OR    | OR       | 95% CI     |
| Ever Cigarette Use       |          |      |                                                              |      |       |          |            |                                |      |       |          |            |
| No                       | 422      | 37.9 | 50                                                           | 26.6 | 1     | 1        | --         | 16                             | 4.64 | 1     | 1        | --         |
| Yes                      | 691      | 62.1 | 138                                                          | 73.4 | 1.84  | 0.99     | 0.64, 1.52 | 329                            | 95.4 | 12.3  | 8.55     | 4.78, 15.3 |
| Current Cigarette Use    |          |      |                                                              |      |       |          |            |                                |      |       |          |            |
| Never smoked             | 422      | 37.9 | 50                                                           | 26.6 | 1     | 1        | --         | 16                             | 4.64 | 1     | 1        | --         |
| Ex-smoker                | 486      | 43.7 | 55                                                           | 29.3 | 1.09  | 0.71     | 0.43, 1.16 | 103                            | 29.9 | 5.02  | 4.39     | 2.38, 8.09 |
| Current Smoker           | 205      | 18.4 | 83                                                           | 44.2 | 3.31  | 1.46     | 0.90, 2.39 | 226                            | 65.5 | 30.9  | 18       | 9.78, 33.2 |
| Cigarettes Per Day       |          |      |                                                              |      |       |          |            |                                |      |       |          |            |
| None                     | 422      | 37.9 | 50                                                           | 26.9 | 1     | 1        | --         | 16                             | 4.64 | 1     | 1        | --         |
| 1-19                     | 243      | 21.9 | 30                                                           | 16.1 | 1.06  | 0.76     | 0.44, 1.34 | 34                             | 9.86 | 3.66  | 3.6      | 1.82, 7.13 |
| 20+                      | 446      | 40.1 | 106                                                          | 57   | 2.37  | 1.16     | 0.72, 1.86 | 295                            | 85.5 | 18.1  | 11.5     | 6.35, 20.7 |
| Pack-years               |          |      |                                                              |      |       |          |            |                                |      |       |          |            |
| None                     | 422      | 38.1 | 50                                                           | 26.9 | 1     | 1        | --         | 16                             | 4.64 | 1     | 1        | --         |
| Less than 20             | 279      | 25.2 | 26                                                           | 14   | 0.76  | 0.61     | 0.34, 1.10 | 28                             | 8.12 | 1.79  | 2.07     | 0.98, 4.37 |
| 20+                      | 406      | 36.7 | 110                                                          | 59.1 | 2.67  | 1.32     | 0.82, 2.11 | 301                            | 87.3 | 19.5  | 12.6     | 6.96, 22.8 |
| Years Smoking Cigarettes |          |      |                                                              |      |       |          |            |                                |      |       |          |            |
| None                     | 422      | 38.1 | 50                                                           | 26.7 | 1     | 1        | --         | 16                             | 4.64 | 1     | 1        | --         |
| 1-19                     | 239      | 21.6 | 24                                                           | 12.8 | 0.74  | 0.59     | 0.33, 1.04 | 18                             | 5.22 | 2.56  | 2.86     | 1.43, 5.72 |
| 20+                      | 448      | 40.4 | 113                                                          | 60.4 | 2.96  | 1.45     | 0.89, 2.36 | 311                            | 90.1 | 21    | 13.3     | 7.28, 24.1 |
| Ever Beer                |          |      |                                                              |      |       |          |            |                                |      |       |          |            |
| No                       | 411      | 36.9 | 42                                                           | 22.5 | 1     | 1        | --         | 76                             | 22   | 1     | 1        | --         |
| Yes                      | 703      | 63.1 | 145                                                          | 77.5 | 2.36  | 1.57     | 0.94, 2.65 | 269                            | 78   | 1.94  | 1.1      | 0.72, 1.68 |
| Ever Wine                |          |      |                                                              |      |       |          |            |                                |      |       |          |            |
| No                       | 469      | 42.2 | 89                                                           | 47.3 | 1     | 1        | --         | 216                            | 63   | 1     | 1        | --         |
| Yes                      | 642      | 57.8 | 99                                                           | 52.7 | 0.78  | 0.85     | 0.57, 1.27 | 127                            | 37   | 0.41  | 0.47     | 0.34, 0.66 |
| Ever Liquor              |          |      |                                                              |      |       |          |            |                                |      |       |          |            |
| No                       | 404      | 36.3 | 52                                                           | 27.7 | 1     | 1        | --         | 79                             | 23   | 1     | 1        | --         |
| Yes                      | 709      | 63.7 | 136                                                          | 72.3 | 1.46  | 1.09     | 0.68, 1.73 | 265                            | 77   | 1.71  | 1.76     | 1.19, 2.62 |

OR: odds ratio; CI: confidence interval

<sup>a</sup>All models exclude missing data; Crude models adjust for matching factors and their interactions; Adjusted models include matching factors, their interactions, education, and fruit and vegetable consumption; Cigarette models adjusted for alcohol consumption and use of other tobacco; Alcohol models adjusted for duration of cigarette smoking, use of other tobacco and other types of alcohol

<sup>b</sup>Estimates obtained from models fit using conditional logistic regression due to convergence issues when using unconditional logistic regression



Supplementary Table 4: Odds of SCCHN Related to Tobacco Use and Alcohol Consumption Within the Carolina Head and Neck Cancer Study (CHANCE), 2002-2006, Stratified by Site With Potential Relationship to HPV Infection, Total Population

| Risk Factor                  | Controls |      |     |      | HPV-Related (N=338) |             |            | Non-HPV Related (N=1002) |      |          |             |            |
|------------------------------|----------|------|-----|------|---------------------|-------------|------------|--------------------------|------|----------|-------------|------------|
|                              | N        | %    | N   | %    | Crude OR            | Adjusted OR | 95% CI     | N                        | %    | Crude OR | Adjusted OR | 95% CI     |
| <b>Current Cigarette Use</b> |          |      |     |      |                     |             |            |                          |      |          |             |            |
| Never smoked                 | 525      | 38.1 | 70  | 20.7 | 1                   | 1           |            | 103                      | 10.3 | 1        | 1           |            |
| Ex-smoker                    | 583      | 42.3 | 121 | 35.8 | 1.72                | 1.31        | 0.89, 1.95 | 273                      | 27.3 | 2.45     | 1.89        | 1.39, 2.57 |
| Current Smoker               | 269      | 19.5 | 147 | 43.5 | 3.24                | 1.46        | 0.96, 2.22 | 623                      | 62.4 | 12.1     | 5.89        | 4.32, 8.03 |
| <b>Cigarettes Per Day</b>    |          |      |     |      |                     |             |            |                          |      |          |             |            |
| None                         | 525      | 38.2 | 70  | 20.8 | 1                   | 1           |            | 103                      | 10.3 | 1        | 1           |            |
| 1-19                         | 338      | 24.6 | 61  | 18.1 | 1.31                | 1.05        | 0.67, 1.64 | 170                      | 17   | 2.41     | 1.85        | 1.33, 2.58 |
| 20+                          | 512      | 37.2 | 206 | 61.1 | 3.02                | 1.6         | 1.08, 2.37 | 725                      | 72.7 | 8.14     | 4.38        | 3.26, 5.90 |
| <b>Years Smoked</b>          |          |      |     |      |                     |             |            |                          |      |          |             |            |
| None                         | 525      | 38.2 | 70  | 20.9 | 1                   | 1           |            | 103                      | 10.4 | 1        | 1           |            |
| 1-19                         | 294      | 21.4 | 46  | 13.7 | 0.96                | 0.92        | 0.58, 1.45 | 73                       | 7.34 | 1.19     | 1.15        | 0.79, 1.68 |
| 20+                          | 554      | 40.4 | 219 | 65.4 | 3.36                | 1.73        | 1.16, 2.58 | 818                      | 82.3 | 8.3      | 4.67        | 3.48, 6.26 |
| <b>Ever Beer</b>             |          |      |     |      |                     |             |            |                          |      |          |             |            |
| No                           | 499      | 36.2 | 57  | 16.9 | 1                   | 1           |            | 186                      | 18.7 | 1        | 1           |            |
| Yes                          | 878      | 63.8 | 280 | 83.1 | 1.87                | 1.12        | 0.73, 1.72 | 811                      | 81.3 | 2.59     | 1.51        | 1.12, 2.03 |
| <b>Ever Wine</b>             |          |      |     |      |                     |             |            |                          |      |          |             |            |
| No                           | 597      | 43.4 | 130 | 38.6 | 1                   | 1           |            | 504                      | 50.7 | 1        | 1           |            |
| Yes                          | 778      | 56.6 | 207 | 61.4 | 1.04                | 1.05        | 0.76, 1.46 | 490                      | 49.3 | 0.68     | 0.67        | 0.53, 0.85 |
| <b>Ever Liquor</b>           |          |      |     |      |                     |             |            |                          |      |          |             |            |
| No                           | 491      | 35.7 | 58  | 17.2 | 1                   | 1           |            | 218                      | 21.8 | 1        | 1           |            |
| Yes                          | 886      | 64.3 | 280 | 82.8 | 2.02                | 1.71        | 1.15, 2.54 | 781                      | 78.2 | 1.88     | 1.3         | 0.99, 1.70 |

CI: confidence interval; OR: odds ratio

<sup>a</sup>All models exclude missing data; Crude models adjust for matching factors and their interactions; Adjusted models include matching factors, their interactions, education, and fruit and vegetable consumption; Cigarette models adjusted for alcohol consumption and use of other tobacco; Alcohol models adjusted for duration of cigarette smoking, use of other tobacco and other types of alcohol

Supplementary Table 5: Odds of SCCHN Related to Tobacco Use and Alcohol Consumption among African-Americans Within the Carolina Head and Neck Cancer Study (CHANCE), 2002-2006, Stratified by Site With Potential Relationship to HPV Infection

| Risk Factor              | Controls |      | HPV-Related (N=76; 21.6% of cases) |      |       |          |            | Non-HPV Related (N=275; 78.4% of cases) |      |       |          |            |
|--------------------------|----------|------|------------------------------------|------|-------|----------|------------|-----------------------------------------|------|-------|----------|------------|
|                          | N        | %    | N                                  | %    | Crude | Adjusted |            | N                                       | %    | Crude | Adjusted |            |
|                          |          |      |                                    |      | OR    | OR       | 95% CI     |                                         |      | OR    | OR       | 95% CI     |
| Ever Cigarette Use       |          |      |                                    |      |       |          |            |                                         |      |       |          |            |
| No                       | 103      | 39   | 1                                  | 1.32 | 1     | 1        | --         | 15                                      | 5.45 | 1     | 1        | --         |
| Yes                      | 161      | 61   | 75                                 | 98.7 | 45    | 22.6     | 2.99, 170  | 260                                     | 94.6 | 11.5  | 8.56     | 3.99, 18.4 |
| Current Cigarette Use    |          |      |                                    |      |       |          |            |                                         |      |       |          |            |
| Never smoked             | 103      | 39   | 1                                  | 1.32 | 1     | 1        | --         | 15                                      | 5.49 | 1     | 1        | --         |
| Ex-smoker                | 97       | 36.7 | 15                                 | 19.7 | 16.4  | 10.3     | 1.28, 83.6 | 65                                      | 23.8 | 4.9   | 5.2      | 2.30, 11.8 |
| Current Smoker           | 64       | 24.2 | 60                                 | 79   | 84.2  | 36.3     | 4.69, 280  | 193                                     | 70.7 | 22    | 12.9     | 5.83, 28.5 |
| Cigarettes Per Day       |          |      |                                    |      |       |          |            |                                         |      |       |          |            |
| None                     | 103      | 39   | 1                                  | 1.32 | 1     | 1        | --         | 15                                      | 5.47 | 1     | 1        | --         |
| 1-19                     | 95       | 36   | 24                                 | 31.6 | 25    | 15.5     | 1.98, 122  | 83                                      | 30.3 | 6.26  | 5.63     | 2.52, 12.6 |
| 20+                      | 66       | 25   | 51                                 | 67.1 | 73.7  | 31.9     | 4.13, 247  | 176                                     | 64.2 | 19.4  | 13.4     | 6.01, 30.0 |
| Years Smoking Cigarettes |          |      |                                    |      |       |          |            |                                         |      |       |          |            |
| None                     | 103      | 39   | 1                                  | 1.35 | 1     | 1        | --         | 15                                      | 5.58 | 1     | 1        | --         |
| 1-19                     | 55       | 20.8 | 3                                  | 4.05 | 5.03  | 5.38     | 0.52, 55.4 | 16                                      | 5.95 | 1.81  | 2.5      | 0.95, 6.61 |
| 20+                      | 106      | 40.2 | 70                                 | 94.6 | 69    | 30.4     | 3.99, 232  | 238                                     | 88.5 | 17.2  | 12.4     | 5.67, 27.0 |
| Pack-years               |          |      |                                    |      |       |          |            |                                         |      |       |          |            |
| None                     | 103      | 39   | 1                                  | 1.35 | 1     | 1        | --         | 15                                      | 5.58 | 1     | 1        | --         |
| 1-19                     | 94       | 35.6 | 15                                 | 20.3 | 15.5  | 9.61     | 1.18, 77.9 | 66                                      | 24.5 | 4.75  | 4.81     | 2.14, 10.8 |
| 20+                      | 67       | 25.4 | 58                                 | 78.4 | 104   | 44.6     | 5.71, 349  | 188                                     | 70   | 22.6  | 16.5     | 7.34, 37.1 |
| Ever Beer                |          |      |                                    |      |       |          |            |                                         |      |       |          |            |
| No                       | 38       | 10.9 | 6                                  | 7.89 | 1     | 1        | --         | 32                                      | 11.8 | 1     | 1        | --         |
| Yes                      | 310      | 89.1 | 70                                 | 92.1 | 4.28  | 1.79     | 0.68, 4.70 | 240                                     | 88.2 | 3.52  | 1.84     | 1.02, 3.32 |
| Ever Wine                |          |      |                                    |      |       |          |            |                                         |      |       |          |            |
| No                       | 110      | 31.6 | 16                                 | 21.1 | 1     | 1        | --         | 94                                      | 34.6 | 1     | 1        | --         |
| Yes                      | 238      | 68.4 | 60                                 | 78.9 | 2.88  | 1.99     | 0.99, 3.99 | 178                                     | 65.4 | 1.65  | 1.06     | 0.67, 1.66 |
| Ever Liquor              |          |      |                                    |      |       |          |            |                                         |      |       |          |            |
| No                       | 40       | 11.4 | 58                                 | 17.2 | 1     | 1        | --         | 218                                     | 21.8 | 1     | 1        | --         |
| Yes                      | 310      | 88.6 | 280                                | 82.8 | 4.09  | 2.45     | 0.96, 6.26 | 781                                     | 78.2 | 3.67  | 2.35     | 1.28, 4.33 |

OR: odds ratio; CI: confidence interval

<sup>a</sup>All models exclude missing data; Crude models adjust for matching factors and their interactions; Adjusted models include matching factors, their interactions, education, and fruit and vegetable consumption; Cigarette models adjusted for alcohol consumption and use of other tobacco; Alcohol models adjusted for duration of cigarette smoking, use of other tobacco and other types of alcohol

Supplementary Table 6: Odds of SCCHN Related to Tobacco Use and Alcohol Consumption among Whites Within the Carolina Head and Neck Cancer Study (CHANCE), 2002-2006, Stratified by Site With Potential Relationship to HPV Infection

| Risk Factor              | Controls |      | HPV-Related (N=262; 26.5% of cases) |      |          |             |            | Non-HPV Related (N=727; 73.5% of cases) |      |          |             |            |
|--------------------------|----------|------|-------------------------------------|------|----------|-------------|------------|-----------------------------------------|------|----------|-------------|------------|
|                          | N        | %    | N                                   | %    | Crude OR | Adjusted OR | 95% CI     | N                                       | %    | Crude OR | Adjusted OR | 95% CI     |
| Ever Cigarette Use       |          |      |                                     |      |          |             |            |                                         |      |          |             |            |
| No                       | 422      | 37.9 | 69                                  | 26.3 | 1        | 1           | --         | 88                                      | 12.1 | 1        | 1           | --         |
| Yes                      | 691      | 62.1 | 193                                 | 73.7 | 1.69     | 1.03        | 0.70, 1.50 | 639                                     | 87.9 | 4.66     | 2.69        | 1.99, 3.63 |
| Current Cigarette Use    |          |      |                                     |      |          |             |            |                                         |      |          |             |            |
| Never smoked             | 422      | 37.9 | 69                                  | 26.3 | 1        | 1           | --         | 88                                      | 12.1 | 1        | 1           | --         |
| Ex-smoker                | 486      | 43.7 | 106                                 | 40.5 | 1.5      | 1.15        | 0.76, 1.75 | 208                                     | 28.7 | 2.11     | 1.57        | 1.13, 2.18 |
| Current Smoker           | 205      | 18.4 | 87                                  | 33.2 | 2        | 0.88        | 0.56, 1.40 | 430                                     | 59.2 | 10.5     | 5.14        | 3.68, 7.19 |
| Cigarettes Per Day       |          |      |                                     |      |          |             |            |                                         |      |          |             |            |
| None                     | 422      | 37.9 | 69                                  | 26.4 | 1        | 1           | --         | 88                                      | 12.2 | 1        | 1           | --         |
| 1-19                     | 243      | 21.9 | 37                                  | 14.2 | 0.95     | 0.8         | 0.48, 1.33 | 87                                      | 12   | 1.78     | 1.43        | 0.98, 2.10 |
| 20+                      | 446      | 40.1 | 155                                 | 59.4 | 2.13     | 1.17        | 0.77, 1.77 | 549                                     | 75.8 | 6.61     | 3.59        | 2.62, 4.93 |
| Years Smoking Cigarettes |          |      |                                     |      |          |             |            |                                         |      |          |             |            |
| None                     | 422      | 38.1 | 69                                  | 26.4 | 1        | 1           | --         | 88                                      | 12.1 | 1        | 1           | --         |
| 1-19                     | 239      | 21.6 | 43                                  | 16.5 | 0.88     | 0.82        | 0.51, 1.32 | 57                                      | 7.86 | 1.09     | 1.01        | 0.67, 1.53 |
| 20+                      | 448      | 40.4 | 149                                 | 57.1 | 2.33     | 1.21        | 0.79, 1.85 | 580                                     | 80   | 6.96     | 3.89        | 2.84, 5.32 |
| Pack-years               |          |      |                                     |      |          |             |            |                                         |      |          |             |            |
| None                     | 422      | 38.1 | 69                                  | 26.5 | 1        | 1           | --         | 88                                      | 12.2 | 1        | 1           | --         |
| 1-19                     | 279      | 25.2 | 42                                  | 16.2 | 0.82     | 0.73        | 0.45, 1.18 | 71                                      | 9.82 | 1.22     | 1.11        | 0.75, 1.64 |
| 20+                      | 406      | 36.7 | 149                                 | 57.3 | 2.51     | 1.32        | 0.86, 2.04 | 564                                     | 78   | 7.65     | 4.18        | 3.04, 5.76 |
| Ever Beer                |          |      |                                     |      |          |             |            |                                         |      |          |             |            |
| No                       | 411      | 36.9 | 51                                  | 19.5 | 1        | 1           | --         | 154                                     | 21.2 | 1        | 1           | --         |
| Yes                      | 703      | 63.1 | 210                                 | 80.5 | 1.56     | 1.01        | 0.64, 1.61 | 571                                     | 78.8 | 2.37     | 1.44        | 1.04, 1.99 |
| Ever Wine                |          |      |                                     |      |          |             |            |                                         |      |          |             |            |
| No                       | 469      | 42.2 | 114                                 | 43.7 | 1        | 1           | --         | 410                                     | 56.8 | 1        | 1           | --         |
| Yes                      | 642      | 57.8 | 147                                 | 56.3 | 0.82     | 0.89        | 0.62, 1.28 | 312                                     | 43.2 | 0.54     | 0.59        | 0.45, 0.76 |
| Ever Liquor              |          |      |                                     |      |          |             |            |                                         |      |          |             |            |
| No                       | 404      | 36.3 | 51                                  | 19.5 | 1        | 1           | --         | 185                                     | 25.5 | 1        | 1           | --         |
| Yes                      | 709      | 63.7 | 211                                 | 80.5 | 1.76     | 1.55        | 1.00, 2.41 | 540                                     | 74.5 | 1.61     | 1.36        | 1.00, 1.83 |

OR: odds ratio; CI: confidence interval

<sup>a</sup>All models exclude missing data; Crude models adjust for matching factors and their interactions; Adjusted models include matching factors, their interactions, education, and fruit and vegetable consumption; Cigarette models adjusted for alcohol consumption and use of other tobacco; Alcohol models adjusted for duration of cigarette smoking, use of other tobacco and other types of alcohol
